# Supplementary material for: Anticipating CRISTAL: An exploration of multi-frequency satellite altimeter snow depth estimates over Arctic sea ice, 2018–2023
Source: Copernicus journal article supplement (doi:10.5194/egusphere-2024-2904), 2024-09-25
Supplement: Supplementary file [file egusphere-2024-2904-AC4-supplement.pdf]

# egusphere-2024-2904 Response to Referee #2

Landy et al.

July 18, 2025

In this document, we outline our responses to comments from the reviewer, including modifications that we intend to make to the manuscript where necessary. Reviewer comments are shown in black and our responses in blue with intended changes to the revised version of the manuscript given in italics.

The study presented in this paper is one of the most advanced analyses of multi-frequency altimetric measurements of sea ice and its snow cover. In a first phase, it provides measurements of the sea ice freeboard using the Ka AltiKa radar altimeter on the Saral satellite, obtained using the LARM physical retracker. This result is already an innovation, as it is the first Ka-band radar freeboard product that provides a realistic topography of sea ice; previous studies focused exclusively on the Ka/Ku differential for snow depth retrieval. This freeboard is then used in combination with the Ku radar freeboard obtained with LARM retracker applied on CryoSat-2 to estimate snow depth. An initial analysis then evaluates this solution against that obtained by combining Ku radar and lidar (KuLa), as well as with airborne snow thickness measurements and the Lagrangian model SnowModelLG. This analysis shows that the snow depth estimate obtained with KuKa seems realistic at the beginning of winter but greatly underestimates this thickness throughout the winter accumulation, even if a slight thickening is observed.

To better understand the origins of this underestimation, an in-depth comparative analysis of each of the freeboards involved in these thickness measurements is provided below, with the aim of better understanding the reasons for these discrepancies: Are they due to retracking problems? to the effects of surface roughness on retracking? to overestimation or underestimation of penetration (or more precisely, variations in the backscatter ratios from air/snow and snow/ice surfaces, and snow volume)?

The results show that it is a combination of these different aspects and allows some of them to be quantified, such as the effect of surface roughness on Ka radar freeboard, which seems to have a negligible effect except in rare situations (high freeboard and low roughness). Nevertheless the Ka freeboard obtained with LARM is underestimated on average relative to IceSat-2, and this is more pronounced for low freeboards aiming to lower snow depth retrieval with KaKu than with LaKu that can reach to only a third of this last one.

The last section presents a simulation of the next CRISTAL dual-frequency altimetry mission which suggests that Ka-band may be underestimated by 10% the total freeboard and the Ku-band overestimated by 3% the ice freeboard. These results are very promising but show that there is still room for improvement. The authors propose various avenues for further study and also emphasize the importance of additional baseline measures.

Given the originality, scientific quality, significance of the implications, and quality of the presentation, I recommend publication of this article with a few minor revisions.

Thank you to the reviewer for this nice summary of our manuscript. We're grateful to them for taking the time to check our manuscript, providing valuable comments that improve the clarity of the work.

Lines 19 and 22: In the following sentences, could you clarify what the percentages refer to? "a median elevation 3% above the snow-ice interface", "median elevation 10% below the air-snow interface".

Good catch, this was confusing. We added "...of the snow depth" after the percentages.

Line 41: CRISTAL will be ready for launch at the end of 2027. This remains the official date for the time being.

Yes, the Chief Mission Scientist reminded us of this shortly after the preprint was published ;)

Lines 65 and 71: I don't believe that Ku could penetrate 60-90% of the snow depth and Ka 0-40% whatever is the snow depth...

We suspect that Ku and Ka can penetrate the full snow depth in most scenarios, but the key question is whether the height that returns maximum backscatter corresponds to the snow surface or base, or somewhere in between. If it is somewhere in between, i.e. within the snowpack, then it is more likely the combination of snow surface and basal scattering is producing a mean scattering height within the snowpack than internal snowpack scattering is dominating the return.

Line 93-95: could be interesting to specify (if possible) from which order of magnitude of altitude the coherent radar reflection becomes dominant for the following analyses; i.e., when going from ground to airborne measurements? or from airborne to space measurements?

We cannot reliably estimate whether radar observations from a surface-based or airborne measurement campaign with specific altitude are likely to be dominated by a coherent radar response. However, based on the criteria given in [Fung and Eom, 1983] for the far-field scattering condition, up to a range of a few 100 meters the coherent backscatter at Ku- or Ka-band depends on the range, whereas exceeding this limit it should not. [Fetterer et al., 1992] use a slightly different definition for the one-sided beamwidth of the radar than [Fung and Eom, 1983] and show that incoherent and coherent backscatter coefficients for rough sea ice should be similar at a range of 5-10 km, in Ku-band. [de Rijke-Thomas et al., 2023] found a significant coherent component in OIB Ku-band radar data from relatively smooth landfast sea ice in the Canadian Arctic, when the flight altitude was 500 m.

We can give an order of magnitude of around 1 km for a narrow-beam nadir-looking radar reflection to be dominated by coherent scattering over sea ice, but it should be a future campaign priority to better understand the role of measurement range in coherent vs incoherent near-nadir scattering at Ku- and Ka-band.

Line 148: to be coherent with titles 2.1 and 2.3, the title 2.2 should be: “SARAL AltiKa Observations” as SARAL is the satellite and AltiKa the altimeter.

Good suggestion. Will be corrected.

Line 193: 350kg/m<sup>3</sup> for the snow density seems a high value. Could it be justify? Even if the impact is low it could worth to adapt this value.

This is actually an error and will be corrected. We originally used a value of 350 kg m<sup>-3</sup>, based on the assumption taken in [Lawrence et al., 2018], but then adapted our analysis of the OIB freeboards to use snow radar data processed with the peakiness method rather than quicklook method (as described in the text and in response to questions from Arttu Juttila). For the revised snow radar processing we used a constant value of 300 kg m<sup>-3</sup> to be consistent with the IceBird data processing.

Line 296: Strange sentence: With revised classes the waveforms previously classed as ambiguous are now generally classed as sea ice.

We agree and will remove this sentence.

Line 330: Now the snow density varies from 266 to 329 kg/m<sup>3</sup> which is not coherent with the previous 350kg/m<sup>3</sup> line 193. Could you specify the used speed propagation equation?

As stated in our response to Reviewer 1:

A fixed snow density of 300 kg m<sup>-3</sup> was applied by [Juttila et al., 2022] to estimate snow depths from the IceBird snow radar observations, so we applied the same fixed snow density to estimate snow depths from the OIB data in April 2019. This was to ensure consistency across the reference snow depth datasets. However, the seasonally-varying function of [Mallett, 2025] used for the satellite data gives a snow density of 329 kg m<sup>-3</sup> in April, so the difference in the ratio of radar wave velocities in snow and free space would be 0.80 vs 0.79, respectively, between these different snow densities.

The equation for speed-of-light dependence on snow density is Eqn 81 in [Ulaby et al., 1986] Volume 3, page 2061:  $c_s = c * (1 + 0.51 * rho_s / 1000)^{-1.5}$

The manuscript will be edited to explain our choices on snow density more clearly.

Line 496: See last comment (for line 674).

Figure 10a: It’s strange to mix-up Ku-band, Ka-band and laser freeboards (both for satellite and airborne)! They should not measure the same surface (air-snow versus snow-ice). Have you applied corrections for the snow impacts (load + speed propagation)? Please justify.

It was a choice made to simplify the plotting, but all necessary corrections have been applied to compare laser or radar freeboards as “apples to apples”.

For instance, the snow depth and speed propagation effect have been taken into account to convert OIB/IceBird laser freeboards and snow radar depths into OIB/IceBird radar freeboards (for comparison with CryoSat-2). No corrections have been applied to the satellite observations here, only to the airborne data so they can be fairly compared to the coinciding satellite freeboard es-

timates. The full method is described in Section 2.4; however, clarifications will be made to the manuscript where necessary.

Figure 10b: Which data are used here? LARM? TFMRA? Both? Also it's strange to see a CS2 freeboard greater than IS2 and SRL. The offset is not clearly shown (add arrows?) and it makes the comparisons difficult.

The LARM data are used for CryoSat-2 and AltiKa here, as stated in the figure caption. However, there was no consensus on the best way to plot Fig 10b and this was decided as the best option, with the offsets applied to avoid all the distributions overlapping. This option at least shows biases between satellite and airborne data and variability of the paired differences.

Figure 11: Very interesting plots but Figures 11a and 11c show exactly the opposite results. I suppose there is an error on the name of the y-axis for 11c (should be SRL-IS2 instead of IS2-SRL).

We can confirm there is no error on the name of the y-axis. These plots are interesting but challenging to interpret and we spent some time considering them.

It is important to note that the colored lines in Fig 11a and c represent different sets of data: increments of SRL freeboard in a and increments of IS2 freeboard in c. So, if we take the highest freeboard increment, it is not surprising that for locations where SRL freeboards are 60-70 cm the SRL freeboards overestimate IS2, and in the same way for locations where IS2 freeboards are 60-70 cm the IS2 freeboards overestimate SRL. What we took away from these plots is related more to the shapes of the curves, as described in the text. For example, there does not appear to be a relationship between the freeboard bias and surface topography, but there is a relationship between the freeboard bias and SRL backscatter.

Line 561: It would be useful to recall here in a short sentence the concept of Mie scattering, as it is very important for understanding the interactions between snow and radar waves.

Good idea, the following will be added:

*(The Mie scattering coefficient quantifies the scattering of incident EM radiation by particles of similar diameter to the wavelength).*

Line 605: This very important section is not as clear as the previous ones. It could be much clearer if you shortly introduce the objective of the following demonstration instead of just the introductory word 'here'.

We will amend this line to the following:

*To investigate the potential effects of different snow properties and surface roughness on CRISTAL observations, we here use the results obtained in Sections 4.1 and 4.2 as the basis for physically-constrained simulations of the CRISTAL dual-frequency altimeter in delay-Doppler SAR mode..*

Lines 496 and 674: All the analyses regarding the threshold to be used to retrieve coherent results are very interesting but it is important to have in mind that the threshold approach is stable only if its value corresponds to the steepest slope of the waveform leading edge and far

from its maximum, i.e. between 30% to 50% as shown Figure 10a in Laforge et al. 2021 url-<https://doi.org/10.1016/j.asr.2020.02.001>. For example, in the extreme case of a 100% threshold, this corresponds to take the maximum of the waveform sampled by the altimeter, i.e., a measurement of the epoch on a sampling gate and therefore with a resolution equal to that of the altimeter (about 20 cm for CryoSat-2 SAR). While this does not affect averages over large areas, it does significantly increase the noise in each measurement. Laforge et al. 2021 propose an alternative that involves correcting the range rather than the threshold, as is done for Sea State Bias in the open sea (see Figure 10). I think it is important to keep this alternative in mind. However, retrackerers based on a physical model are clearly the best option.

We agree with the analysis and think that such an approach could also be applied in the case of a physical retracker. The physical model results (i.e., a lookup table of modelled echoes) could be used to determine a range correction that depends on certain waveform shape parameters – parameters that can be obtained from both the modelled and observed waveforms. The range correction can be generated relative to a fixed retracking threshold on the steepest, most stable part of the waveform, as suggested.

In any case, here all analyses of freeboards from a threshold retracker are made at the 25-km grid cell scale, integrating typically many hundreds of individual along-track samples, so the impacts of noise in the threshold retracker results should be negligible.

## References

- [de Rijke-Thomas et al., 2023] de Rijke-Thomas, C., Landy, J., Mallett, R., Willatt, R., Tsamados, M., and King, J. (2023). Airborne investigation of quasi-specular ku-band radar scattering for satellite altimetry over snow-covered arctic sea ice. *IEEE Transactions on Geoscience and Remote Sensing*.
- [Fetterer et al., 1992] Fetterer, F., Drinkwater, M., Jezek, K., Laxon, S., and Onstott, R. (1992). Sea ice altimetry. In Carsey, F., editor, *Microwave Remote Sensing of Sea Ice (Geophysical Monograph*, pages 111–135. American Geophysical Union, Washington D.C, 62 edition.
- [Fung and Eom, 1983] Fung, A. and Eom, H. (1983). Coherent scattering of a spherical wave from an irregular surface. *IEEE Transactions on Antennas and Propagation*, 31(1):68–72.
- [Juttila et al., 2022] Juttila, A., Hendricks, S., Ricker, R., von Albedyll, L., Krumpen, T., and Haas, C. (2022). Retrieval and parameterisation of sea-ice bulk density from airborne multi-sensor measurements. *The Cryosphere*, 16(1):259–275.
- [Lawrence et al., 2018] Lawrence, I., Tsamados, M., Stroeve, J., Armitage, T., and Ridout, A. (2018). Estimating snow depth over Arctic sea ice from calibrated dual-frequency radar freeboards. *Cryosphere*, 12:3551–3564.
- [Mallett, 2025] Mallett, R. D. (2025). A methodologically robust densification function for snow on multiyear arctic sea ice. *Journal of Glaciology*, 71:e24.
- [Ulaby et al., 1986] Ulaby, F., Moore, R., and Fung, A. (1986). K.: *Microwave remote sensing: Active and passive*. Pages: 997 , Volume: 3.
